# Supplementary material
Source: MDPI journal article supplement (https://www.mdpi.com/2311-7524/9/10/1105)
Supplement: s1 [file s1]

Archive with 2 entries (2 files):
- horticulturae-2594434-figure S1-3.pdf
- Supplementary table S1.xlsx
