# Supplementary material
Source: MDPI journal article supplement (https://www.mdpi.com/2311-7524/9/10/1105)
Supplement: s1 [file s1 › horticulturae-2594434-figure S1-3.pdf]

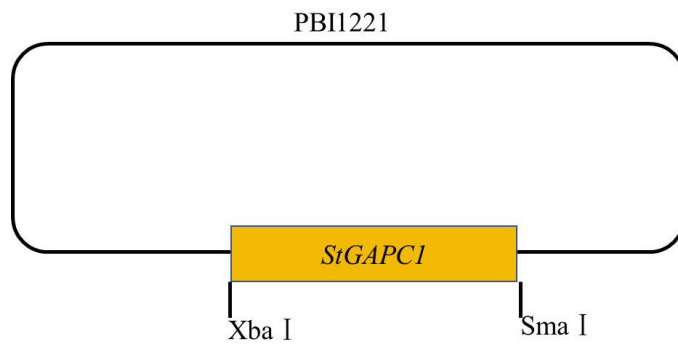

Supplementary Figure S1. The map of constructed vector

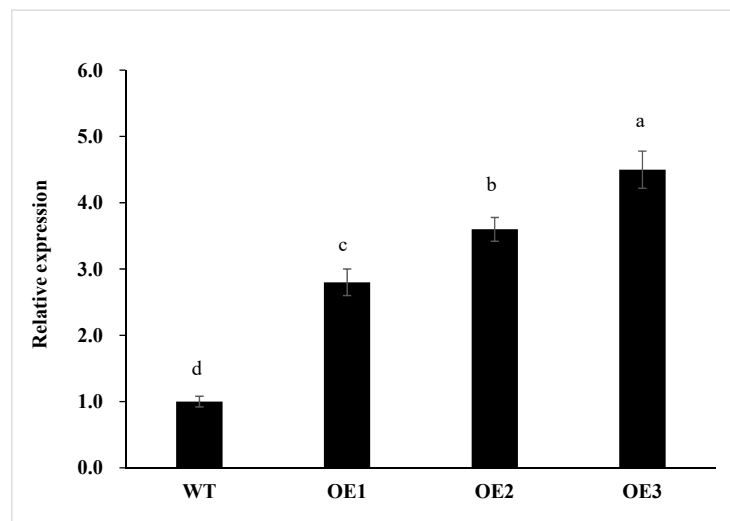

Supplementary Figure S2. Expression level analysis of *StGAPC1* in transgenic lines. Note: CK indicates control. WT means wild type; OE1-3 indicates transgenic lines. Three independent experiments were done, Different letters indicate significant differences ( $n = 3, p < 0.05$ ).

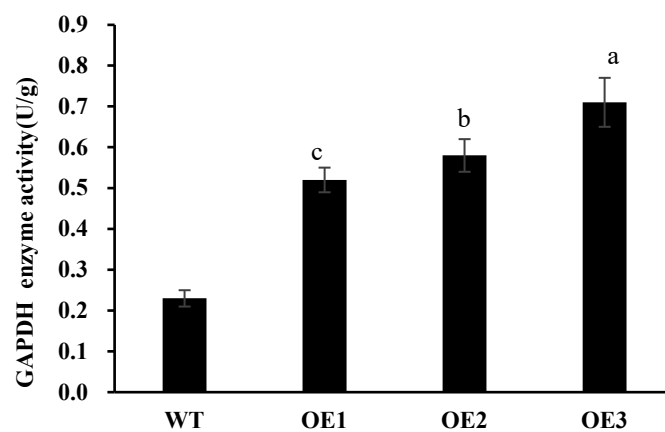

Supplementary Figure S3. The activity analysis of GAPDH in transgenic lines. Note: CK indicates control. WT means wild type; OE1-3 indicates transgenic lines. Three independent experiments were done, Different letters indicate significant differences ( $n = 3, p < 0.05$ ).
