# Supplementary material
Source: MDPI journal article supplement (https://www.mdpi.com/2311-7524/9/10/1105)
Supplement: s1 [file s1 › Supplementary table S1.xlsx]

## Sheet: primer sequences
Supplementary Table S1. The primer sequences of ten genes.
Gene name	Forward primer	Reverse primer
NRT2.1	GCTGGAGTTGCCTCTGTTTC	AACCTCACAGCAACGTACCC
NRT2.4	GCAGACGGTGGCTGGATTGATG	AAGCACGCCATAACCAGAACAGAC
NRT2.5	TCTGAACATAAAGCCACT	GTCACGGATAATAGGAAG
NRT1.5	CGACGATGACACAACTGGTGGTAG	CCTGCTTCTGGCTCTCAAGTTCC
NRT2.7	GCAGACGGTGGCTGGATTGATG	AAGCACGCCATAACCAGAACAGAC
NRT4.5	GGAACTGCIGAAATACTCGC	GTCCAGCTAGAGTGAACAAA
NRT4.6	TCGTA AGGTA ACCAAGACAG	GTCCAGCTAGAGTGAACAAA
NRT1.1	AAATGAGGATAGCAAGAGCC	GAGAAAGACAGATAAGGAGC
NR	ACGCTGAACTTGCTAACGCTGAA	ATGGCACGGAGTTGTAATGACAGAG
GS1	AATGAGCGTCGTCTCACTGG	GGCTGGCCTGTCCTCAAAG
